# Supplementary material for: Structural and electrochemical properties of Tan+1Cn MXene anode materials for metal-ion batteries
Source: Royal Society of Chemistry journal article supplement (doi:10.1039/d3qi02335d), 2024-01-01
Supplement: d3qi02335d1.pdf [file d3qi02335d1.pdf]

## Supplementary Material

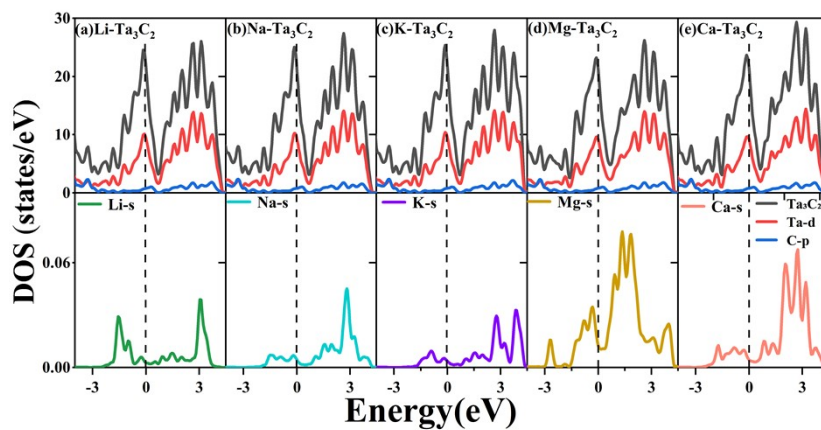

**Figure S1.** DOS of Ta<sub>3</sub>C<sub>2</sub>M (M = Li, Na, K, Mg, and Ca).

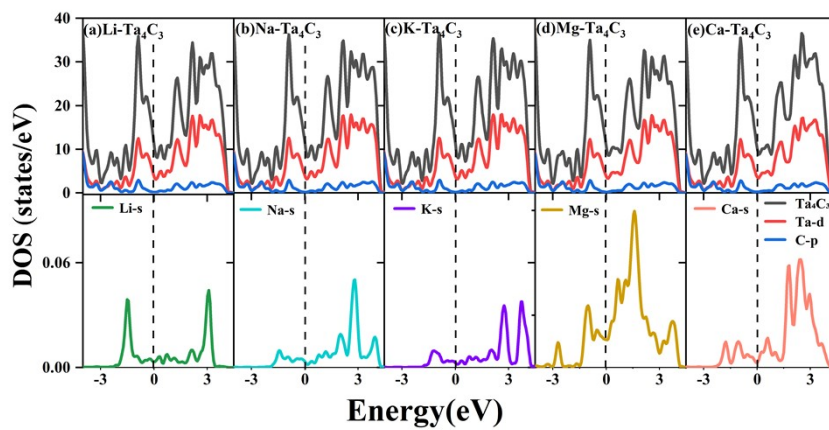

**Figure S2.** DOS of Ta<sub>4</sub>C<sub>3</sub>M (M = Li, Na, K, Mg, and Ca).

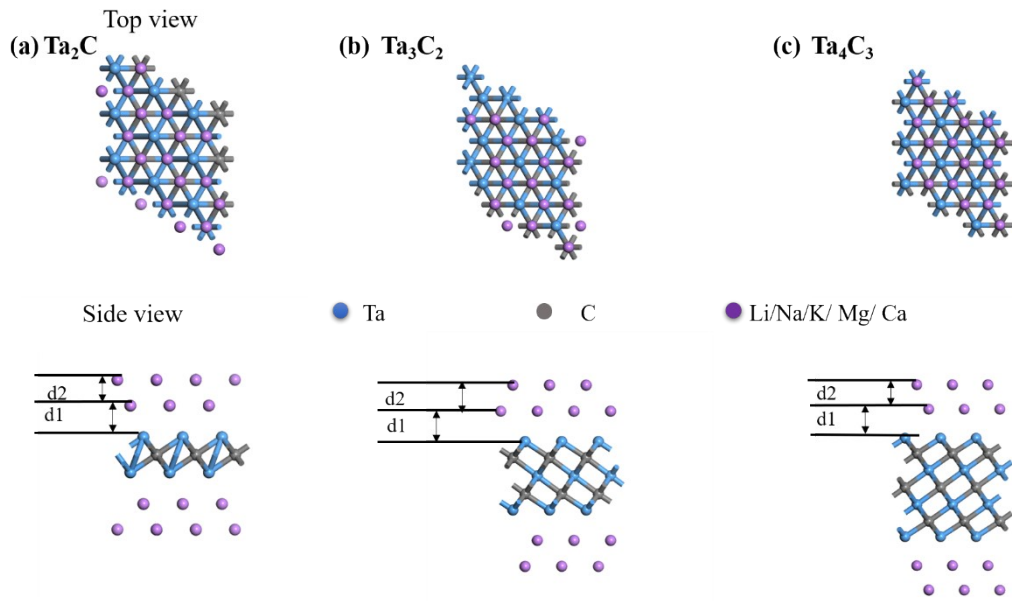

**Figure S3.** Vertical distance between the metal atoms and the surface of  $Ta_{n+1}C_n$  MXenes.

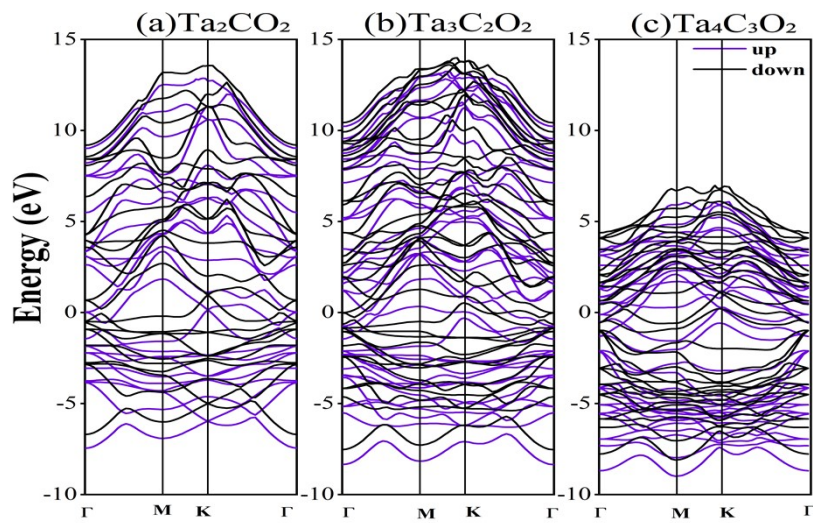

**Figure S4.** Band structures of  $Ta_{n+1}C_nO_2$  MXenes.

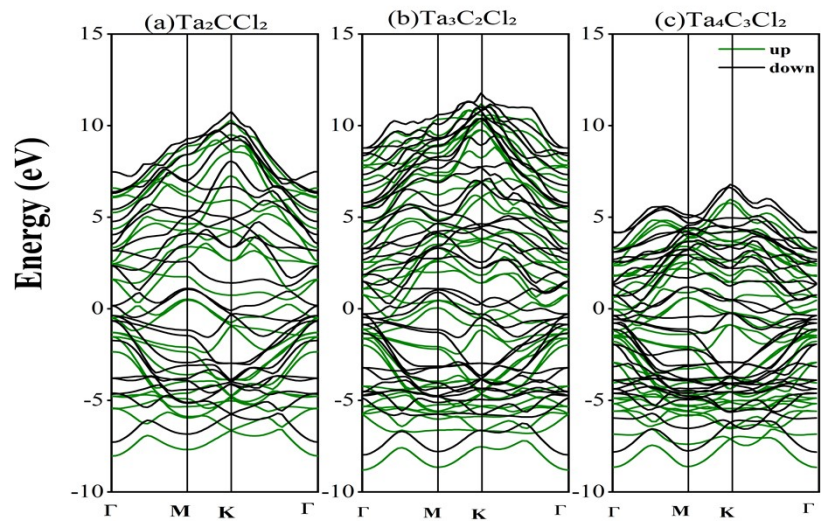

**Figure S5.** Band structures of  $Ta_{n+1}C_nCl_2$  MXenes.

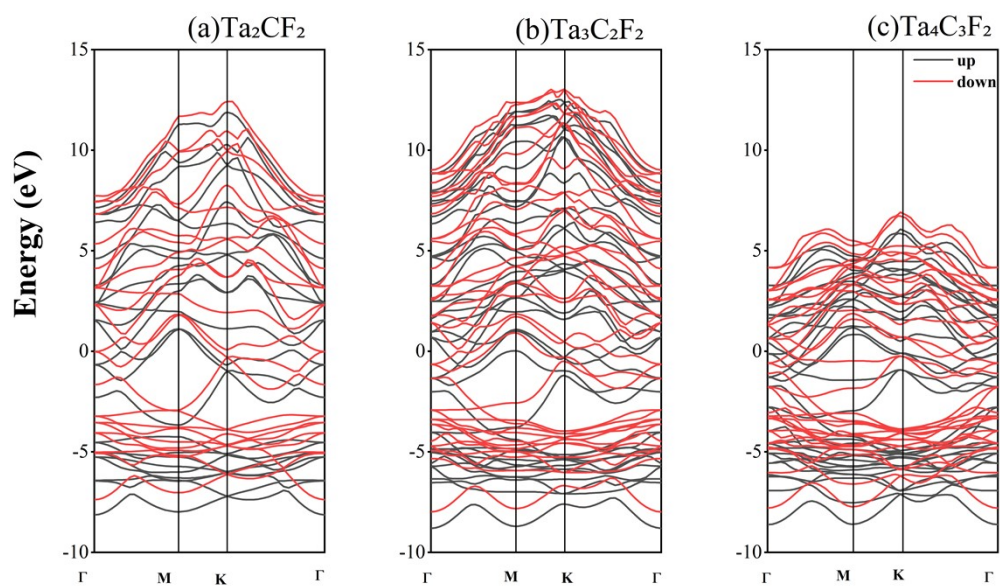

**Figure S6.** Band structures of  $Ta_{n+1}C_nCl_2$  MXenes.

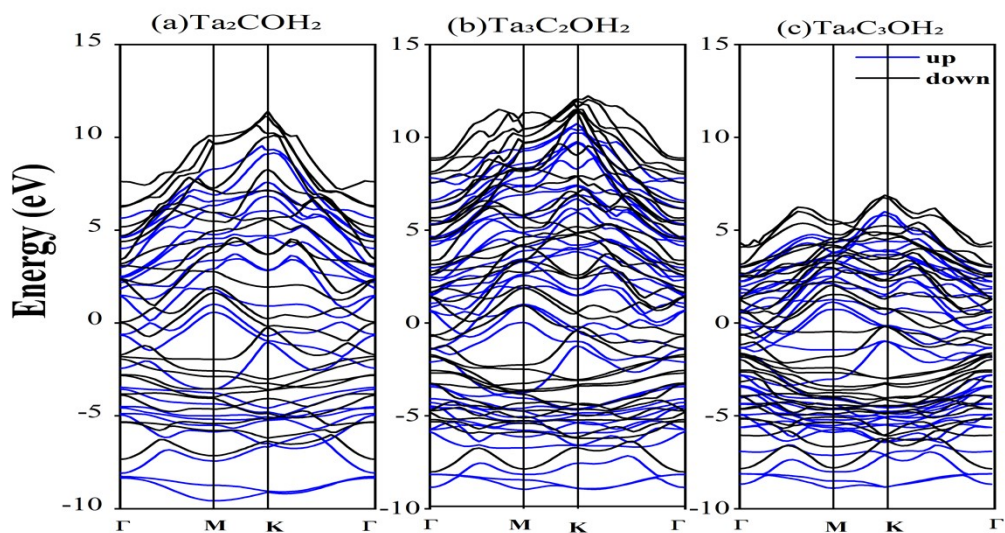

**Figure S7.** Band structures of  $Ta_{n+1}C_nCl_2$  MXenes.

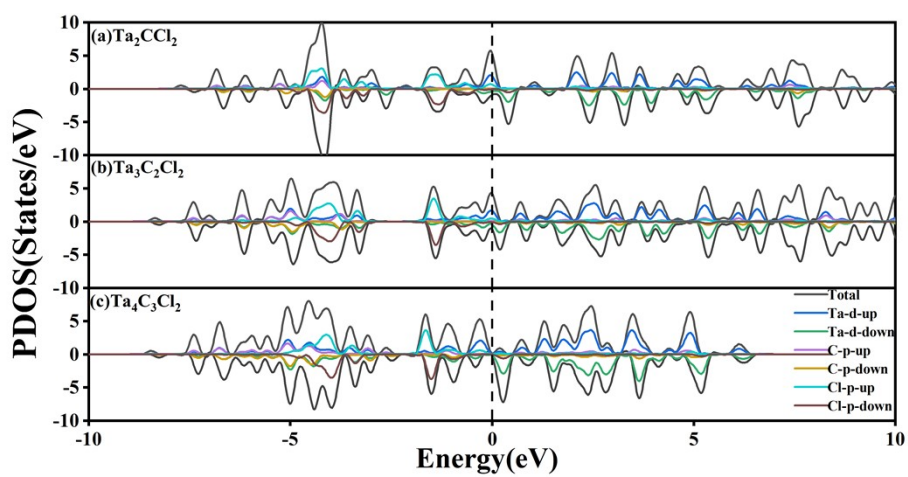

**Figure S8.** DOS structures of  $Ta_{n+1}C_nCl_2$  MXenes

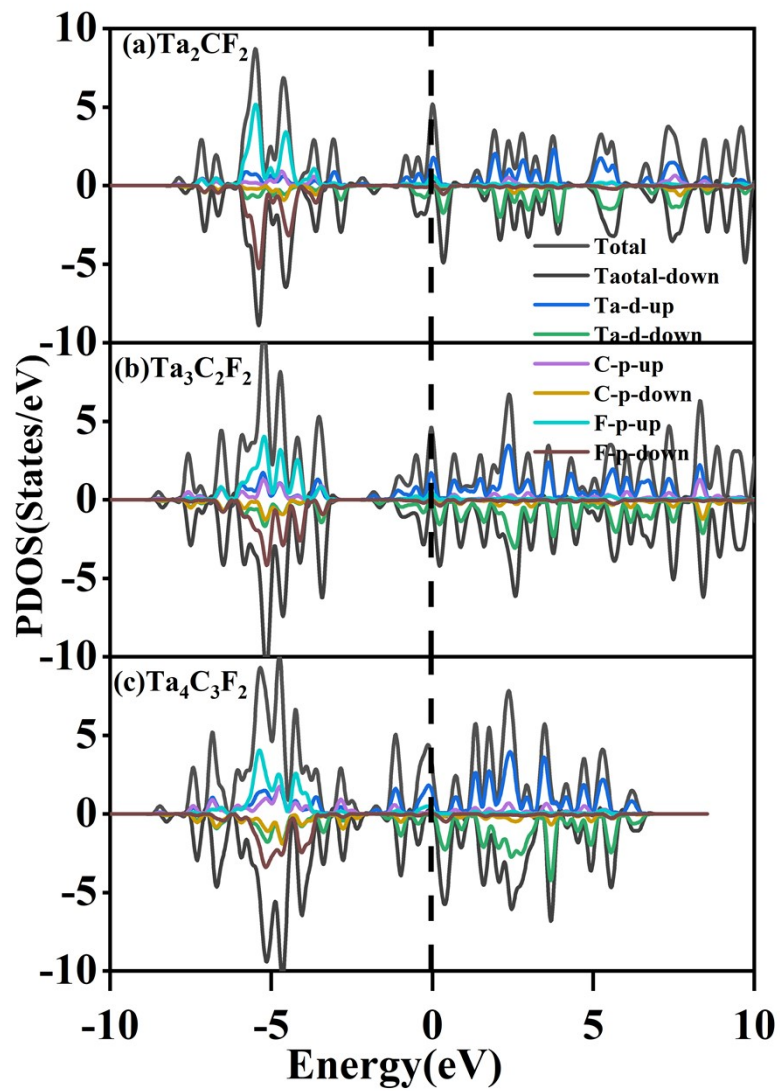

Figure S9. DOS of  $\text{Ta}_{n+1}\text{C}_n\text{Cl}_2$  MXenes

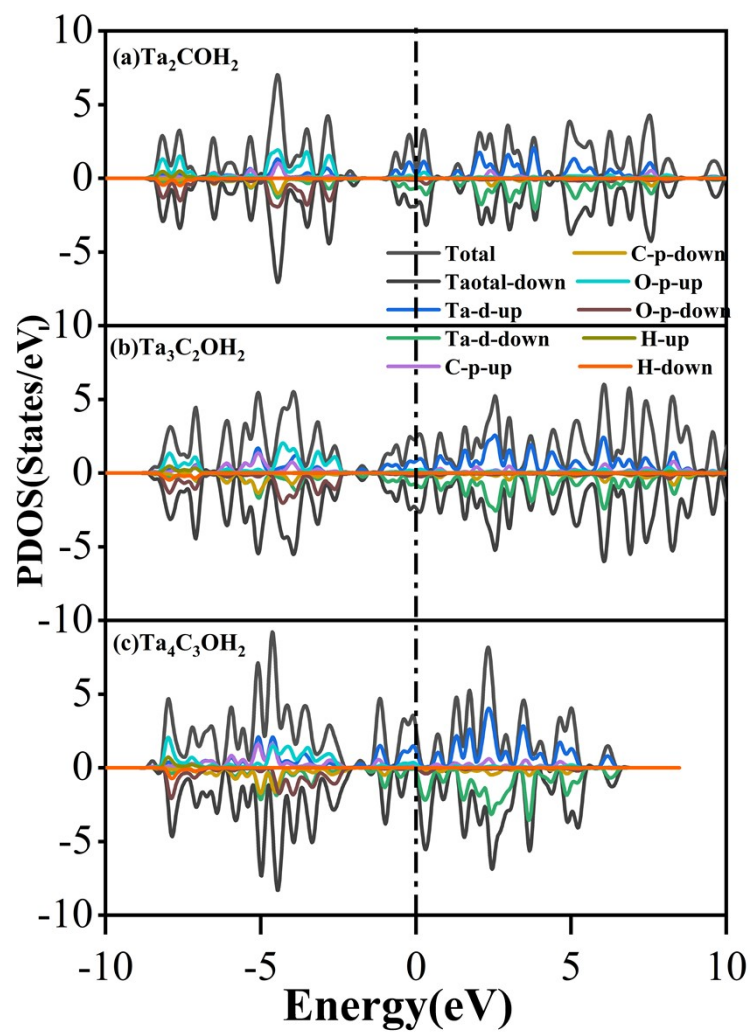

Figure S10. DOS of  $\text{Ta}_{n+1}\text{C}_n\text{Cl}_2$  MXenes

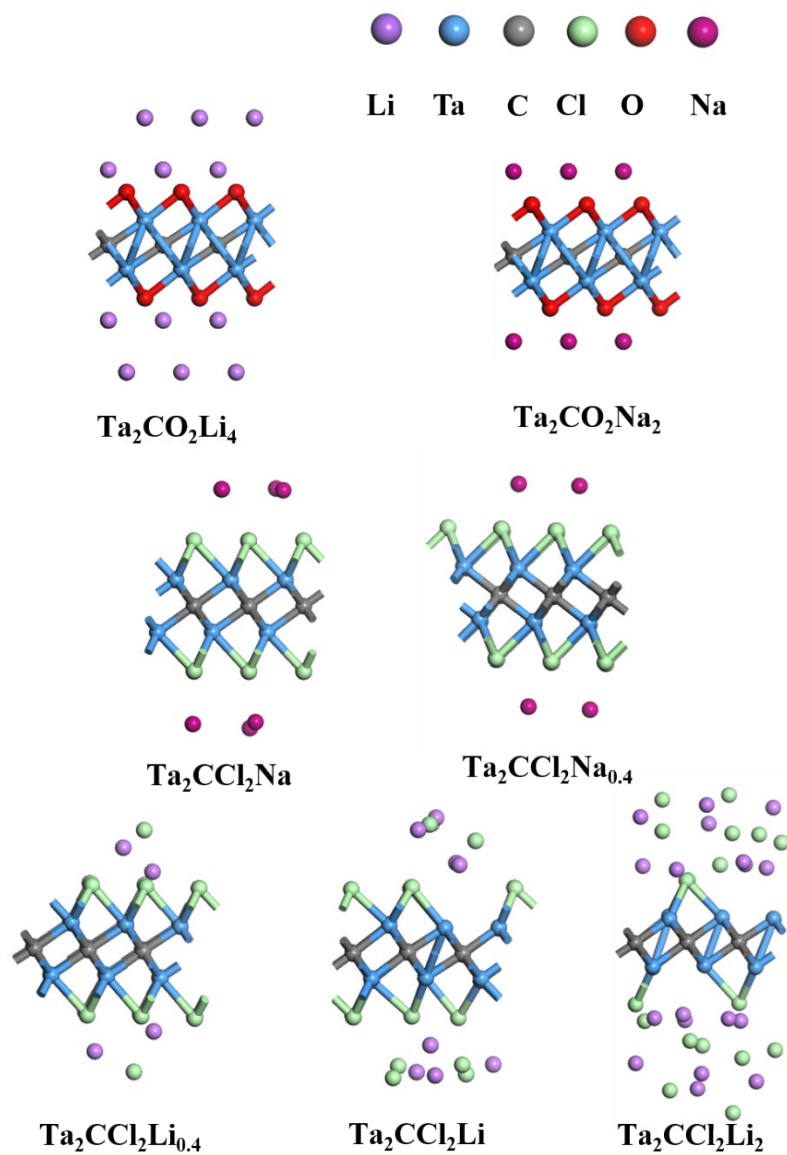

**Figure S11.** Side view structures of Ta<sub>2</sub>CT<sub>2</sub>M<sub>x</sub> MXenes.
